# Supplementary material for: New Classification for the Reporting of Complications in Retinal Detachment Surgical Trials
Source: PubMed Central journal article supplement (PMC8227451; doi:10.1001/jamaophthalmol.2021.1078), 2021-06-24
Supplement: jamaophthalmol-e211078-s001.pdf [file jamaophthalmol-e211078-s001.pdf]

## Supplemental Online Content

Xu ZY, Azuara-Blanco A, Kadonosono K, et al; the CORDS Study Group. New classification for the reporting of complications in retinal detachment surgical trials. *JAMA Ophthalmol*. Published online June 24, 2021. doi:10.1001/jamaophthalmol.2021.1078

**eTable 1.** Preliminary list of complications of retinal detachment surgery used to develop the Delphi survey

**eTable 2.** Delphi Survey – Full round 1 and 2 results

**eTable 3.** Complications ranked by severity scores and classified as mild (median scores 1-4), moderate (median scores 5-7) and severe (median scores 8-10)

This supplemental material has been provided by the authors to give readers additional information about their work.

**eTable 1: Preliminary list of complications of retinal detachment surgery used to develop the Delphi survey**

| <b>1. General complications</b>                                                                 | <b>Score</b>  |
|-------------------------------------------------------------------------------------------------|---------------|
| <b>1a. Intra-operative</b>                                                                      | <b>(1-10)</b> |
| Intra-operative subconjunctival haemorrhage                                                     |               |
| Intra-operative chemosis                                                                        |               |
| Intra-ocular bleeding:                                                                          |               |
| - Subretinal haemorrhage not involving macula                                                   |               |
| - Subretinal haemorrhage involving macula                                                       |               |
| - Suprachoroidal haemorrhage not involving macula                                               |               |
| - Suprachoroidal haemorrhage involving macula                                                   |               |
| <b>1b. Post-operative</b>                                                                       |               |
| Post-operative subconjunctival haemorrhage                                                      |               |
| Post-operative chemosis                                                                         |               |
| Loss of visual acuity attributable to surgical procedure:                                       |               |
| - Moderate (loss of 3-5 lines on ETDRS chart)                                                   |               |
| - Severe (loss of $\geq 6$ lines on ETDRS chart)                                                |               |
| Visual field loss not related to retinal detachment but attributable to the surgical procedure: |               |
| - Mild (<1 quadrant, not involving fixation)                                                    |               |
| - Severe ( $\geq 1$ quadrant, or involving fixation)                                            |               |
| Refractive changes                                                                              |               |
| - <2D                                                                                           |               |
| - $\geq 2$ D                                                                                    |               |
| Corneal decompensation / severe corneal oedema                                                  |               |
| IOP-related                                                                                     |               |
| - Early high IOP self-resolving                                                                 |               |
| - Persistent high IOP manageable with drops                                                     |               |
| - Persistent high IOP requiring surgery                                                         |               |
| - Persistent hypotony (IOP < 5mmHg) without macular folds                                       |               |
| - Persistent hypotony with macular folds                                                        |               |
| Phthisis                                                                                        |               |
| IOL displacement                                                                                |               |
| IOL dislocation                                                                                 |               |
| Serous choroidal detachment                                                                     |               |
| - Peripheral                                                                                    |               |
| - Large, kissing                                                                                |               |
| Post-op suprachoroidal haemorrhage                                                              |               |
| - Peripheral                                                                                    |               |
| - Involving macula                                                                              |               |
| Symptomatic epimacular membrane                                                                 |               |
| Post-op macular oedema                                                                          |               |
| Post-op macular hole formation                                                                  |               |
| Persistent localised subretinal fluid                                                           |               |
| - Peripheral, non-progressive                                                                   |               |
| - Submacular                                                                                    |               |
| Retinal re-detachment due to PVR                                                                |               |
| Endophthalmitis                                                                                 |               |
| Sympathetic ophthalmia                                                                          |               |
| <b>2. Complications relating to pars-plana vitrectomy</b>                                       |               |
| <b>2a. Intra-operative</b>                                                                      |               |
| Unintended enlargement of sclerotomy                                                            |               |
| Suprachoroidal / subretinal infusion                                                            |               |

|                                                                                                  |  |
|--------------------------------------------------------------------------------------------------|--|
| Leaking ports at the end of surgery requiring suturing                                           |  |
| Cataract development intra-operatively (due to lens touch)                                       |  |
| - Without capsular breach                                                                        |  |
| - With capsular breach                                                                           |  |
| Related to tamponade agents:                                                                     |  |
| - Intra-operative displacement of perfluorocarbon liquid (PFCL) under the retina                 |  |
| - Small bubble formation when inserting PFCL                                                     |  |
| - 'Sticky' silicone oil at the time of removal                                                   |  |
| Iatrogenic retinal tears                                                                         |  |
| Vitreo-retinal incarceration in sclerotomy                                                       |  |
| <b>2b. Post-operative</b>                                                                        |  |
| Anterior displacement of tamponade agent                                                         |  |
| - PFCL                                                                                           |  |
| - Silicone Oil                                                                                   |  |
| Subfoveal PFCL                                                                                   |  |
| Subretinal displacement of silicone oil and heavy silicone oils                                  |  |
| Incomplete removal of tamponade agent                                                            |  |
| Unexplained visual acuity loss associated with insertion / removal of silicone oil               |  |
| Emulsification of tamponade agents                                                               |  |
| Non-infectious uveitis                                                                           |  |
| Leaky sclerotomy requiring suturing                                                              |  |
| Post-op maculopathy related to light toxicity                                                    |  |
| Post-op maculopathy related to dye toxicity                                                      |  |
| Macular folds                                                                                    |  |
| - Involving fixation                                                                             |  |
| - Not involving fixation                                                                         |  |
| Retinal slippage                                                                                 |  |
| Retinal re-detachment due to new tear formation                                                  |  |
| <b>3. Complications relating to scleral buckling</b>                                             |  |
| <b>3a. Intra-operative</b>                                                                       |  |
| Vitreo-retinal incarceration in sclerotomy at the time of draining of subretinal fluid           |  |
| Inadvertent scleral perforation when suturing explant                                            |  |
| Inadvertent drainage of subretinal fluid                                                         |  |
| Air/ gas injection behind the lens                                                               |  |
| Subretinal injection of air / gas                                                                |  |
| Cataract development intra-operatively (due to lens touch, e.g. at time of injection of air/gas) |  |
| - Without capsular breach                                                                        |  |
| - With capsular breach                                                                           |  |
| <b>3b. Post-operative</b>                                                                        |  |
| Complications relating to the buckle                                                             |  |
| - Exposure                                                                                       |  |
| - Migration                                                                                      |  |
| - Infection                                                                                      |  |
| Diplopia/ strabismus                                                                             |  |
| - Corrected with glasses / prisms                                                                |  |
| - Requiring surgery                                                                              |  |
| <b>4. Complications relating to pneumatic retinopathy</b>                                        |  |
| <b>4a. Intra-operative</b>                                                                       |  |
| 'Fish-egg' gas bubble formation                                                                  |  |
| Gas injection behind the lens                                                                    |  |
| Sub-retinal injection of gas                                                                     |  |
| Cataract development intra-operatively (due to lens touch, at the time of injection of gas)      |  |
| - Without capsular breach                                                                        |  |
| - With capsular breach                                                                           |  |
| <b>4b. Post-operative</b>                                                                        |  |
| New retinal break formation                                                                      |  |
| Retinal re-detachment due to new tear formation                                                  |  |

**eTable 2a: Delphi Round 1 Results: Median and IQR scores for complications by technique: pars-plana vitrectomy (PPV), scleral buckle (SB), pneumatic retinopexy (PR), and whether intra-operative (IO) or post-operative (PO)**

| Category               | Complication                                                                                                                                  | Median | IQR |
|------------------------|-----------------------------------------------------------------------------------------------------------------------------------------------|--------|-----|
| General IO             | Subconjunctival haemorrhage                                                                                                                   | 1      | 0   |
|                        | Chemosis                                                                                                                                      | 1      | 1   |
|                        | Subretinal haemorrhage not involving macula                                                                                                   | 3      | 1   |
|                        | Subretinal haemorrhage involving macula                                                                                                       | 7      | 1.5 |
|                        | Suprachoroidal haemorrhage not involving macula                                                                                               | 5      | 3   |
|                        | Suprachoroidal haemorrhage involving macula                                                                                                   | 9      | 2.5 |
| General PO             | Subconjunctival haemorrhage                                                                                                                   | 1      | 0   |
|                        | Chemosis                                                                                                                                      | 1      | 0   |
|                        | Loss of visual acuity attributable to surgical procedure: Moderate (3-5 lines ETDRS chart)                                                    | 6      | 2   |
|                        | Loss of visual acuity attributable to surgical procedure: Severe ( $\geq 6$ lines on ETDRS chart)                                             | 8      | 2   |
|                        | Visual field loss not related to retinal detachment but attributable to surgical procedure: Mild ( $< 1$ quadrant, not involving fixation)    | 5      | 3   |
|                        | Visual field loss not related to retinal detachment but attributable to surgical procedure: Severe ( $\geq 1$ quadrant or involving fixation) | 7      | 1   |
|                        | Refractive changes: $< 2D$                                                                                                                    | 2      | 1   |
|                        | Refractive changes: $\geq 2D$                                                                                                                 | 4      | 2   |
|                        | Corneal decompensation / severe corneal oedema                                                                                                | 7      | 2   |
|                        | Early raised IOP, self-resolving                                                                                                              | 2      | 1   |
|                        | Persistently raised IOP manageable with drops                                                                                                 | 4      | 2   |
|                        | Persistently raised IOP requiring surgery                                                                                                     | 7      | 2   |
|                        | Persistent hypotony (IOP $< 5$ mmHg) without macular folds                                                                                    | 6      | 2   |
|                        | Persistent hypotony with macular folds                                                                                                        | 8      | 2   |
|                        | Phthisis                                                                                                                                      | 10     | 0   |
|                        | IOL displacement                                                                                                                              | 4      | 1.5 |
|                        | IOL dislocation                                                                                                                               | 6      | 3   |
|                        | Serous choroidal detachment: peripheral                                                                                                       | 3      | 1   |
|                        | Serous choroidal detachment: large, kissing                                                                                                   | 7      | 2   |
|                        | Suprachoroidal haemorrhage: peripheral                                                                                                        | 4      | 3   |
|                        | Suprachoroidal haemorrhage: involving macula                                                                                                  | 8      | 2   |
|                        | Macular oedema                                                                                                                                | 4      | 1.5 |
|                        | Macular hole formation                                                                                                                        | 6      | 2   |
|                        | Persistent localised subretinal fluid: peripheral, non-progressive                                                                            | 3      | 1   |
|                        | Persistent localised subretinal fluid: submacular                                                                                             | 5      | 2.5 |
|                        | Retinal re-detachment due to new or worsening PVR                                                                                             | 7      | 1   |
|                        | Endophthalmitis                                                                                                                               | 9      | 1   |
| Sympathetic ophthalmia | 9                                                                                                                                             | 2      |     |
| PPV IO                 | Unintended enlargement of sclerotomy                                                                                                          | 2      | 0.5 |
|                        | Suprachoroidal / subretinal infusion                                                                                                          | 4      | 2   |
|                        | Leaking ports at the end of surgery requiring suturing                                                                                        | 2      | 1   |
|                        | Cataract development intra-operatively (due to lens touch): Without capsular breach                                                           | 4      | 3   |
|                        | Cataract development intra-operatively (due to lens touch): With capsular breach                                                              | 5      | 3   |
|                        | Intra-operative displacement of perfluorocarbon liquid (PFCL) under the retina                                                                | 6      | 3   |

|        |                                                                                                                          |   |     |
|--------|--------------------------------------------------------------------------------------------------------------------------|---|-----|
|        | Small bubble formation when inserting PFCL                                                                               | 2 | 2   |
|        | 'Sticky' silicone oil at the time of removal                                                                             | 3 | 3   |
|        | Iatrogenic retinal tears                                                                                                 | 4 | 1   |
|        | Vitreo-retinal incarceration in sclerotomy                                                                               | 5 | 3   |
| PPV PO | Anterior displacement of tamponade agent: PFCL                                                                           | 3 | 1   |
|        | Anterior displacement of tamponade agent: Silicone oil                                                                   | 4 | 2   |
|        | Subfoveal PFCL                                                                                                           | 7 | 2   |
|        | Subretinal displacement of silicone oil and heavy silicone oils                                                          | 7 | 2.5 |
|        | Incomplete removal of tamponade agent                                                                                    | 5 | 3   |
|        | Unexplained visual acuity loss associated with insertion / removal of silicone oil                                       | 7 | 2   |
|        | Emulsification of tamponade agents                                                                                       | 4 | 2   |
|        | Leaky sclerotomy requiring suturing                                                                                      | 3 | 3   |
|        | Maculopathy related to light toxicity                                                                                    | 7 | 2   |
|        | Maculopathy related to dye toxicity                                                                                      | 7 | 2   |
|        | Macular folds: not involving fixation                                                                                    | 4 | 1   |
|        | Macular folds: involving fixation                                                                                        | 7 | 2   |
|        | Retinal slippage                                                                                                         | 6 | 2   |
|        | Retinal re-detachment due to new tear formation                                                                          | 7 | 2.5 |
|        | Non-infectious uveitis                                                                                                   | 4 | 3   |
| SB IO  | Vitreo-retinal incarceration in sclerotomy at time of draining of subretinal fluid                                       | 6 | 2   |
|        | Inadvertent scleral perforation when suturing explant                                                                    | 4 | 3   |
|        | Inadvertent drainage of subretinal fluid                                                                                 | 3 | 1   |
|        | Air / gas injection behind the lens                                                                                      | 3 | 3   |
|        | Sub-retinal injection of air / gas                                                                                       | 6 | 2   |
|        | Cataract development intra-operatively (due to lens touch e.g. at time of injection of air/gas): Without capsular breach | 4 | 2   |
|        | Cataract development intra-operatively: With capsular breach                                                             | 7 | 3   |
| SB PO  | Exposure of the buckle                                                                                                   | 3 | 2   |
|        | Infection of the buckle                                                                                                  | 5 | 3   |
|        | Migration of the buckle                                                                                                  | 4 | 2   |
|        | Diplopia / strabismus: Corrected with glasses / prisms                                                                   | 4 | 2.5 |
|        | Diplopia / strabismus: Requiring surgery                                                                                 | 6 | 3   |
| PR IO  | 'Fish-egg' gas bubble formation                                                                                          | 3 | 2   |
|        | Gas injection behind the lens                                                                                            | 3 | 3   |
|        | Sub-retinal injection of gas                                                                                             | 6 | 2   |
|        | Cataract development intra-operatively (due to lens touch at the time of gas injection): Without capsular breach         | 4 | 2.5 |
|        | Cataract development intra-operatively: With capsular breach                                                             | 7 | 3   |
| PR PO  | New retinal tear formation                                                                                               | 4 | 3   |
|        | Retinal re-detachment due to new tear formation                                                                          | 6 | 4   |

**eTable 2b: Delphi Round 2 Results: Median and IQR scores for complications by technique: pars-plana vitrectomy (PPV), scleral buckle (SB), pneumatic retinopexy (PR), and whether intra-operative (IO) or post-operative (PO)**

|            | <b>Complication</b>                                                                                                       | <b>Median</b> | <b>IQR</b> |
|------------|---------------------------------------------------------------------------------------------------------------------------|---------------|------------|
| General IO | Subretinal haemorrhage not involving macula, <= 1 quadrant                                                                | 3             | 2          |
|            | Subretinal haemorrhage not involving macula, > 1 quadrant                                                                 | 4             | 2          |
|            | Subretinal haemorrhage involving macula, <= 3 disc areas                                                                  | 7             | 2          |
|            | Subretinal haemorrhage involving macula, > 3 disc areas                                                                   | 8             | 2          |
|            | Suprachoroidal haemorrhage not involving macula and no kissing                                                            | 5             | 2.75       |
|            | Suprachoroidal haemorrhage involving macula or kissing                                                                    | 9             | 2          |
| General PO | Visual field loss not related to retinal detachment but attributable to surgical procedure: Not affecting driving license | 4             | 2          |
|            | Visual field loss not related to retinal detachment but attributable to surgical procedure: Affecting driving license     | 7             | 2          |
|            | Early hypotony, self-resolving                                                                                            | 2             | 1          |
|            | IOL dislocation                                                                                                           | 6             | 1          |
|            | Suprachoroidal haemorrhage: not involving macula and no kissing                                                           | 5             | 2          |
|            | Suprachoroidal haemorrhage: involving macula or kissing                                                                   | 9             | 1          |
|            | Persistent localised subretinal fluid: submacular                                                                         | 5             | 2          |
|            |                                                                                                                           |               |            |
| PPV IO     | Suprachoroidal infusion                                                                                                   | 5             | 2          |
|            | Subretinal infusion                                                                                                       | 5             | 2.75       |
|            | Cataract development intra-operatively (due to lens touch): Without capsular breach                                       | 4             | 2          |
|            | Cataract development intra-operatively (due to lens touch): With capsular breach                                          | 5             | 1          |
|            | Intra-operative displacement of perfluorocarbon liquid (PFCL) under the retina                                            | 6             | 1          |
|            | Vitreo-retinal incarceration in sclerotomy                                                                                | 5             | 2          |
| PPV PO     | Subretinal displacement of silicone oil and heavy silicone oils                                                           | 7             | 1          |
|            | Incomplete removal of tamponade agent                                                                                     | 5             | 1          |
|            | Leaky sclerotomy requiring suturing                                                                                       | 3             | 1          |
|            | Retinal re-detachment due to new tear formation                                                                           | 7             | 1          |
|            | Non-infectious uveitis                                                                                                    | 4             | 1          |
| SB IO      | Inadvertent scleral perforation when suturing explant                                                                     | 4             | 1          |
|            | Air / gas injection behind the lens (pre-anterior hyaloid)                                                                | 4             | 1          |
|            | Cataract development intra-operatively: With capsular breach                                                              | 7             | 1          |
| SB PO      | Early exposure of the buckle (<1 week)                                                                                    | 5             | 2          |
|            | Delayed exposure of the buckle (after 1 week)                                                                             | 4             | 2          |
|            | Infection of the buckle                                                                                                   | 5             | 1.75       |
|            | Early migration of the buckle (<1 week)                                                                                   | 5             | 2.75       |
|            | Delayed migration of the buckle (after 1 week)                                                                            | 5             | 1          |
|            | Diplopia / strabismus: Corrected with glasses / prisms                                                                    | 4             | 1          |
|            | Diplopia / strabismus: Requiring surgery                                                                                  | 6             | 1.75       |
| PR IO      | 'Fish-egg' gas bubble formation not affecting view of retina                                                              | 2             | 1          |
|            | 'Fish-egg' gas bubble formation affecting view of retina                                                                  | 4             | 1          |

|       |                                                                                                                  |   |   |
|-------|------------------------------------------------------------------------------------------------------------------|---|---|
|       | Gas injection behind the lens (pre-anterior hyaloid)                                                             | 4 | 1 |
|       | Cataract development intra-operatively (due to lens touch at the time of gas injection): Without capsular breach | 4 | 1 |
|       | Cataract development intra-operatively: With capsular breach                                                     | 7 | 1 |
| PR PO | New retinal tear formation                                                                                       | 4 | 1 |
|       | Retinal re-detachment due to new tear formation                                                                  | 6 | 2 |

**eTable 3: Complications ranked by severity scores and classified as mild (median scores 1-4), moderate (median scores 5-7) and severe (median scores 8-10)**

| Complication                                                                                | Severity Score |
|---------------------------------------------------------------------------------------------|----------------|
| <b>MILD</b>                                                                                 |                |
| Chemosis                                                                                    | 1              |
| Subconjunctival haemorrhage                                                                 | 1              |
| Refractive changes: < 2D                                                                    | 2              |
| Early hypotony, self-resolving                                                              | 2              |
| Early raised IOP, self-resolving                                                            | 2              |
| Leaking ports at the end of PPV requiring suturing                                          | 2              |
| Small bubble formation when inserting PFCL in PPV                                           | 2              |
| Unintended enlargement of the sclerotomy in PPV                                             | 2              |
| Fish-egg' gas bubble formation not affecting view of retina in PR                           | 2              |
| Subretinal haemorrhage not involving macula, ≤ 1 quadrant                                   | 3              |
| Serous choroidal detachment: peripheral                                                     | 3              |
| Persistent localised subretinal fluid: peripheral, non-progressive                          | 3              |
| Anterior displacement of PFCL during PPV                                                    | 3              |
| Leaky sclerotomy during PPV requiring suturing                                              | 3              |
| Subretinal haemorrhage not involving macula, > 1 quadrant                                   | 4              |
| Visual field loss attributable to the surgical procedure: Not affecting driving license     | 4              |
| Refractive changes: ≥ 2D                                                                    | 4              |
| Persistently raised IOP manageable with drops                                               | 4              |
| IOL displacement                                                                            | 4              |
| Macular oedema                                                                              | 4              |
| Cataract development intra-operatively (due to lens touch): Without capsular breach         | 4              |
| Iatrogenic retinal tears following PPV                                                      | 4              |
| Anterior displacement of Silicone oil following PPV                                         | 4              |
| Emulsification of tamponade agent following PPV                                             | 4              |
| Macular folds: not involving fixation following PPV                                         | 4              |
| Non-infectious uveitis following PPV                                                        | 4              |
| Inadvertent scleral perforation when suturing explant during SB                             | 4              |
| Air / gas injection behind the lens (pre-anterior hyaloid) during SB or PN                  | 4              |
| Delayed exposure of the buckle (after 1 week)                                               | 4              |
| Diplopia / strabismus: Corrected with glasses / prisms following SB                         | 4              |
| Fish-egg' gas bubble formation affecting the view of the retina in PR                       | 4              |
| New retinal tear formation postoperatively following PR                                     | 4              |
| <b>MODERATE</b>                                                                             |                |
| Suprachoroidal haemorrhage not involving macula and no kissing*                             | 5              |
| Persistent localised subretinal fluid: submacular                                           | 5              |
| Cataract development intra-operatively (due to lens touch): With capsular breach during PPV | 5              |
| Suprachoroidal infusion during PPV                                                          | 5              |
| Subretinal infusion* during PPV                                                             | 5              |
| Vitreo-retinal incarceration in sclerotomy during PPV                                       | 5              |
| Incomplete removal of tamponade agent following PPV                                         | 5              |
| Early exposure of SB (<1 week)                                                              | 5              |
| Infection of SB                                                                             | 5              |
| Early migration of SB(<1 week)*                                                             | 5              |
| Delayed migration of SB (after 1 week)                                                      | 5              |
| Loss of visual acuity attributable to surgical procedure: Moderate (3-5 lines ETDRS chart)  | 6              |
| Persistent hypotony (IOP < 5mmHg) without macular folds                                     | 6              |
| IOL dislocation                                                                             | 6              |

|                                                                                                                       |    |
|-----------------------------------------------------------------------------------------------------------------------|----|
| <b>MODERATE</b>                                                                                                       |    |
| Macular hole formation                                                                                                | 6  |
| Intra-operative displacement of PFCL under the retina during PPV                                                      | 6  |
| Retinal slippage during PPV                                                                                           | 6  |
| Vitreo-retinal incarceration in sclerotomy at time of draining of subretinal fluid during SB                          | 6  |
| Sub-retinal injection of air / gas during SB or PR                                                                    | 6  |
| Diplopia / strabismus: Requiring surgery post SB                                                                      | 6  |
| Retinal re-detachment due to new tear formation post PR                                                               | 6  |
| Subretinal haemorrhage involving macula, $\leq 3$ disc areas                                                          | 7  |
| Visual field loss not related to retinal detachment but attributable to surgical procedure: Affecting driving license | 7  |
| Corneal decompensation / severe corneal oedema                                                                        | 7  |
| Persistently raised IOP requiring surgery                                                                             | 7  |
| Serous choroidal detachment: large, kissing                                                                           | 7  |
| Retinal re-detachment due to new or worsening PVR                                                                     | 7  |
| Subfoveal PFCL post PPV                                                                                               | 7  |
| Subretinal displacement of silicone oil and heavy silicone oils post PPV                                              | 7  |
| Unexplained visual acuity loss associated with insertion / removal of silicone oil post PPV                           | 7  |
| Maculopathy related to light toxicity post PPV                                                                        | 7  |
| Maculopathy related to dye toxicity post PPV                                                                          | 7  |
| Macular folds: involving fixation post PPV                                                                            | 7  |
| Retinal re-detachment due to new tear formation post PPV                                                              | 7  |
| Cataract development intra-operatively: With capsular breach post SB or PR                                            | 7  |
| <b>SEVERE</b>                                                                                                         |    |
| Subretinal haemorrhage involving macula, $> 3$ disc areas                                                             | 8  |
| Loss of visual acuity attributable to surgical procedure: Severe ( $\geq 6$ lines on ETDRS chart)                     | 8  |
| Persistent hypotony with macular folds                                                                                | 8  |
| Suprachoroidal haemorrhage involving macula or kissing                                                                | 9  |
| Suprachoroidal haemorrhage: involving macula or kissing                                                               | 9  |
| Endophthalmitis                                                                                                       | 9  |
| Sympathetic ophthalmia                                                                                                | 9  |
| Phthisis                                                                                                              | 10 |

PPV = pars plana vitrectomy; SB = scleral buckle; PR = pneumatic retinopexy; PFCL = perfluorocarbonyl liquid.

\*Interquartile range = 2.75 (i.e. did not reach consensus)
